# Supplementary material for: PP2ACdc55’s role in reductional chromosome segregation during achiasmate meiosis in budding yeast is independent of its FEAR function
Source: PubMed Central journal article supplement (PMC4960654; doi:10.1038/srep30397), 2016-07-26
Supplement: srep30397-s1.pdf [file srep30397-s1.pdf]

**PP2A<sup>Cdc55</sup>'s role in reductional chromosome segregation during achiasmate meiosis in budding yeast is independent of its FEAR function**

Gary W. Kerr<sup>1</sup>, Jin Huei Wong<sup>2</sup> and Prakash Arumugam<sup>2, 3\*</sup>

1. University of Salford, UK.

2. Bioinformatics Institute, Singapore 138673

3. National University of Singapore, Department of Biological Sciences,

**\*Corresponding author Email:** prakasha@bii.a-star.edu.sg

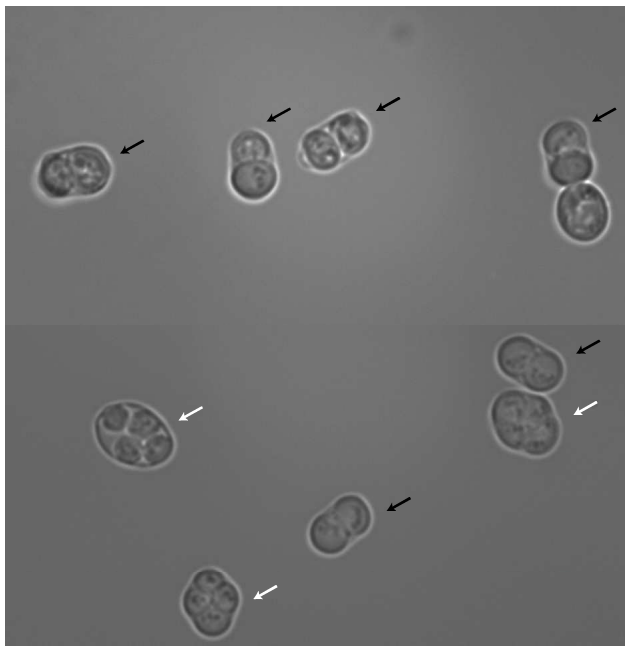

***CDC55 spo11 $\Delta$  spo12 $\Delta$***

***cdc55-T5 spo11 $\Delta$  spo12 $\Delta$***

**Supplementary Figure 1**

***cdc55-T5* partially suppresses the dyad phenotype of *spo11 $\Delta$  spo12 $\Delta$*  cells.**

*spo11 $\Delta$  spo12 $\Delta$*  cells containing either *CDC55* or *cdc55-T5* were sporulated and the resulting asci were examined by bright-field microscopy. Tetrads and dyads are indicated by white and dark arrows respectively.

**Supplementary Table 1 List of yeast strains used in the paper.**

All yeast strains used are derivatives of SK1 and have the following markers, unless otherwise stated. *ho::LYS2/ho::LYS2*, *ura3/ura3*, *leu2::hisG/leu2::hisG*, *trp1::hisG/trp1::hisG*, *his3::hisG/his3::hisG*, *lys2/lys2*. Strains used for experiments described in the figures are listed in the table below. All markers are homozygous in diploid strains unless mentioned otherwise.

| Strain name | Genotype                                                                                                                                                                               | Used in Figure(s) |
|-------------|----------------------------------------------------------------------------------------------------------------------------------------------------------------------------------------|-------------------|
| Y1707       | MATa/α <i>cdc55Δ::natMX4 spo11Δ::TRP1 (K. lactis)</i><br><i>spo12Δ::KanMX4</i>                                                                                                         | 2a                |
| Y1905       | MATa/α <i>cdc55:: CDC55-hphMX6::natMX4</i><br><i>P<sub>URA3</sub>::tetR::GFP-LEU2, rec8:REC8-ha3::URA3, PDS1-myc18::TRP1(K.lactis) ura3/ura3:tetOx224-URA3</i>                         | 2b                |
| Y1906       | MATa/α <i>cdc55:: CDC55-hphMX6::natMX4</i><br><i>spo12:KanMX6 P<sub>URA3</sub>::tetR::GFP-LEU2, rec8:REC8-ha3::URA3, PDS1-myc18::TRP1(K.lactis)</i><br><i>ura3/ura3:tetOx224-URA3</i>  | 2b                |
| Y1907       | MATa/α <i>cdc55:: cdc55-T5-hphMX6::natMX4</i><br><i>P<sub>URA3</sub>::tetR::GFP-LEU2 rec8:REC8-ha3::URA3 PDS1-myc18::TRP1(K.lactis) ura3/ura3:tetOx224-URA3</i>                        | 2b                |
| Y1908       | MATa/α <i>cdc55:: cdc55-T5-hphMX6::natMX4</i><br><i>spo12:KanMX4 P<sub>URA3</sub>::tetR::GFP-LEU2 rec8:REC8-ha3::URA3 PDS1-myc18::TRP1(K.lactis)</i><br><i>ura3/ura3:tetOx224-URA3</i> | 2b                |
| Y1994       | MATa <i>lte1Δ::HIS3MX6</i>                                                                                                                                                             | 2c                |

|       |                                                                                                                                                                                                  |          |
|-------|--------------------------------------------------------------------------------------------------------------------------------------------------------------------------------------------------|----------|
| Y1998 | MAT $\alpha$ <i>cdc55::CDC55-hphMX6::natMX4 spo12::KanMX4</i>                                                                                                                                    | 2c       |
| Y2000 | MAT $\alpha$ <i>cdc55::cdc55-T5-hphMX6::natMX4<br/>spo12<math>\Delta</math>::KanMX4</i>                                                                                                          | 2c       |
| Y1991 | MAT $\alpha$ <i>cdc55<math>\Delta</math>::natMX4 NET1::ha3:HIS3 cdc20::P<sub>MET3</sub><sup>-</sup><br/>CDC20::TRP1</i>                                                                          | 2d       |
| Y1992 | MAT $\alpha$ <i>cdc55::CDC55::natMX4 NET1::ha3:HIS3<br/>cdc20::P<sub>MET3</sub><sup>-</sup>-CDC20::TRP1</i>                                                                                      | 2d       |
| Y1993 | MAT $\alpha$ <i>cdc55::cdc55-T5-hphMX6::natMX4 NET1::ha3-<br/>HIS3 cdc20:: P<sub>MET3</sub><sup>-</sup>-CDC20::TRP1</i>                                                                          | 2d       |
| Y2154 | MAT $\alpha/\alpha$ <i>spo12<math>\Delta</math>::KanMX4 cdc55<math>\Delta</math>::cdc55-T5-<br/>hphMX6::natMX4 net1<math>\Delta</math>::his5, NET1--TEVmyc9::TRP1</i>                            | 2e       |
| Y2155 | MAT $\alpha/\alpha$ <i>spo12<math>\Delta</math>::KanMX4 cdc55<math>\Delta</math>:: cdc55-T5-<br/>hphMX6::natMX4 net1<math>\Delta</math>::his5, net1-6CDK-<br/>TEVmyc9::TRP1</i>                  | 2e       |
| Y1018 | MAT $\alpha/\alpha$ <i>spo11<math>\Delta</math>::TRP1 (K. lactis) spo12<math>\Delta</math>::KanMX4</i>                                                                                           | 3a and b |
| Y1019 | MAT $\alpha/\alpha$ <i>spo11<math>\Delta</math>::TRP1 (K. lactis) spo12<math>\Delta</math>::KanMX4<br/>mam1:HIS3MX6</i>                                                                          | 3a and b |
| Y2152 | MAT $\alpha/\alpha$ <i>spo11<math>\Delta</math>::TRP1 (K. lactis) spo12<math>\Delta</math>::KanMX4<br/>cdc55<math>\Delta</math>::CDC55-hphMX6::natMX4</i>                                        | 3b and 5 |
| Y2153 | MAT $\alpha/\alpha$ <i>spo11<math>\Delta</math>::TRP1 (K. lactis) spo12<math>\Delta</math>::KanMX4<br/>cdc55<math>\Delta</math>:: cdc55-MP-hphMX6 ::natMX4</i>                                   | 3b and 5 |
| Y2157 | MAT $\alpha/\alpha$ <i>spo11<math>\Delta</math>::TRP1 (K. lactis) spo12<math>\Delta</math>::KanMX4<br/>cdc55<math>\Delta</math>::cdc55-T5-hphMX6::natMX4</i>                                     | 3b       |
| Y2424 | MAT $\alpha/\alpha$ <i>spo11<math>\Delta</math>::TRP1 (K. lactis) spo12<math>\Delta</math>::KanMX4<br/>cdc55<math>\Delta</math>::cdc55-MP-hphMX6::natMX4 net1<math>\Delta</math>::his5 net1-</i> | 3b       |

|       |                                                                                                                                                                                            |          |
|-------|--------------------------------------------------------------------------------------------------------------------------------------------------------------------------------------------|----------|
|       | <i>6CDK-TEVmyc9::TRP1</i>                                                                                                                                                                  |          |
| Y1887 | <i>MATa/α cdc55:: CDC55-hphMX6::natMX4 spo11:TRP1<br/>spo12: KanMX4 P<sub>URA3</sub>::tetR::GFP-LEU2 rec8:REC8-<br/>ha3::URA3 PDS1-myc18::TRP1(K.lactis)<br/>ura3/ura3:tetOx224:URA3</i>   | 4a       |
| Y1896 | <i>MATa/α cdc55:: cdc55-MP-hphMX6::natMX4<br/>spo11:TRP1spo12: KanMX4 P<sub>URA3</sub>::tetR::GFP-LEU2<br/>rec8:REC8-ha3::URA3 PDS1-myc18::TRP1(K.lactis),<br/>ura3/ura3:tetOx224:URA3</i> | 4a       |
| Y3153 | <i>MATa/α cdc55:: CDC55-hphMX6::natMX4<br/>P<sub>URA3</sub>::tetR::GFP-LEU2 rec8:REC8-ha3::URA3 PDS1-<br/>myc18::TRP1(K.lactis) ura3:tetOx224:URA3</i>                                     | 4b       |
| Y3154 | <i>MATa/α cdc55:: cdc55-MP-hphMX6::natMX4<br/>P<sub>URA3</sub>::tetR::GFP-LEU2 rec8:REC8-ha3::URA3 PDS1-<br/>myc18::TRP1(K.lactis) ura3:tetOx224:URA3</i>                                  | 4b       |
| Y3153 | <i>MATa/α cdc55::CDC55-hphMX6::natMX4<br/>P<sub>URA3</sub>::tetR::GFP::LEU2,rec8:REC8-ha3::URA3, PDS1-<br/>myc18::TRP1(K.lactis) ura3/ura3:tetOx224-URA3</i>                               | 4c and d |
| Y3154 | <i>MATa/α cdc55:: cdc55-MP-hphMX6::natMX4<br/>P<sub>URA3</sub>::tetR::GFP::LEU2,rec8:REC8-ha3::URA3 PDS1-<br/>myc18::TRP1(K.lactis) ura3/ura3:tetOx224-URA3</i>                            | 4c and d |
| Y2421 | <i>MATa/α spo11Δ::TRP1 (K. lactis) spo12Δ::KanMX4<br/>cdc55Δ:: cdc55-MP-hphMX6:: natMX4 mad2Δ::HIS3MX6</i>                                                                                 | 5        |
| Y2485 | <i>MATa/α cdc55::cdc55-MP-hphMX6::natMX4<br/>spo11Δ::TRP1 (K.lactis) spo12Δ::KanMX4</i>                                                                                                    | 5        |

|       |                                                                                                         |   |
|-------|---------------------------------------------------------------------------------------------------------|---|
|       | <i>clb3Δ::natMX4</i>                                                                                    |   |
| Y2578 | <i>MATa/α spo11Δ::TRP1 (K. lactis) spo12Δ::KanMX4</i><br><i>CDC55/ cdc55:: cdc55-MP::hphMX6::natMX4</i> | 5 |
